# Supplementary material for: Plasmonic Coupled Cavities on Moire Surfaces
Source: Royal Society of Chemistry journal article supplement (doi:10.1039/c2an36513h), 2010-03-18

## Electronic Supplementary Information

### **Flow injection chemiluminescence immunoassay of Microcystin-LR by using PEI-modified magnetic beads as capturer and HRP-functionalized silica nanoparticles as signal amplifier**

Jusheng Lu, Wei Wei, Lihong Yin, Yuepu Pu, Songqin Liu\*

*School of Chemistry and Chemical Engineering, Key Laboratory of Environmental Medicine Engineering, Ministry of Education, Southeast University, Jiangning District, Nanjing, 211189, P.R. China.*

\*Corresponding author at: School of Chemistry and Chemical Engineering, Southeast University, Nanjing, 211189, P. R. China. Tel.: 86-25-52090613; Fax: 86-25-52090618.

*E-mail addresses:* [liusq@seu.edu.cn](mailto:liusq@seu.edu.cn) (S. Q. Liu)

**Fig. S1 Schematic diagram of flow injection chemiluminescence immunoassay**

**for MC-LR.** (a) On-line cyclic incubation of MB/PEI/Ab1/MC-LR and Ab2/Si; (b) FI-CL detection of MC-LR. P1, P2, peristaltic pump; V, eight-port valve; F, flow cell; W, waste; PMT, photomultiplier.

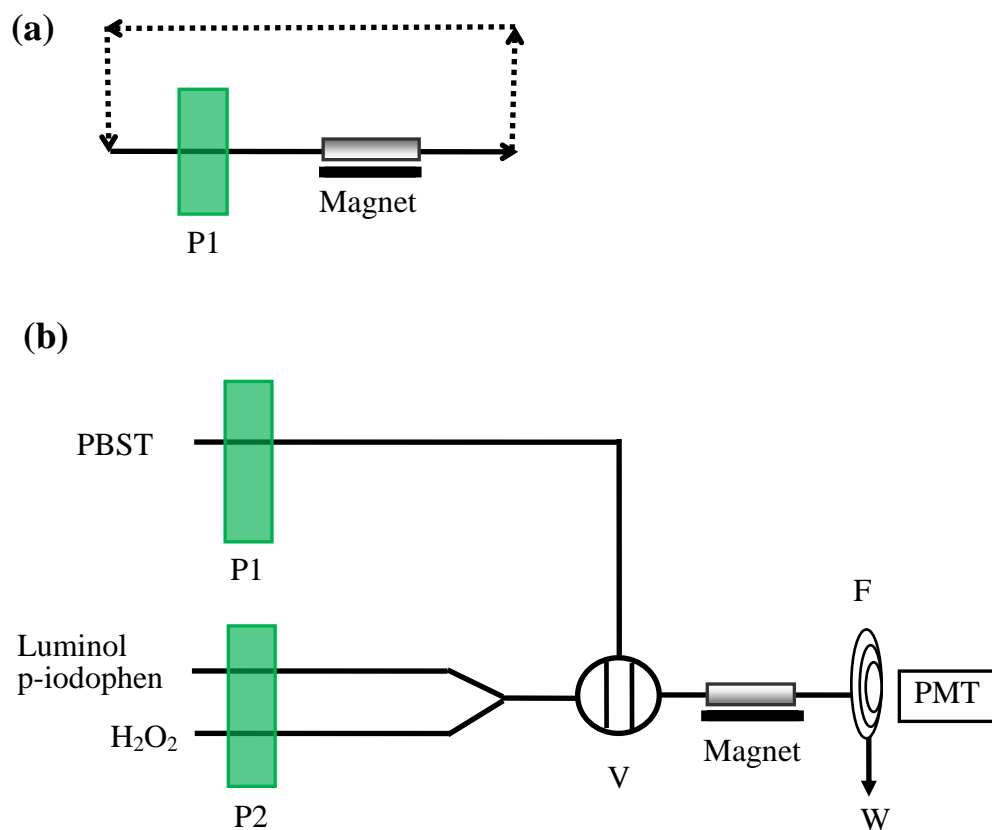

**Fig. S2 SEM images of MB (a) and MB-PEI (b).**

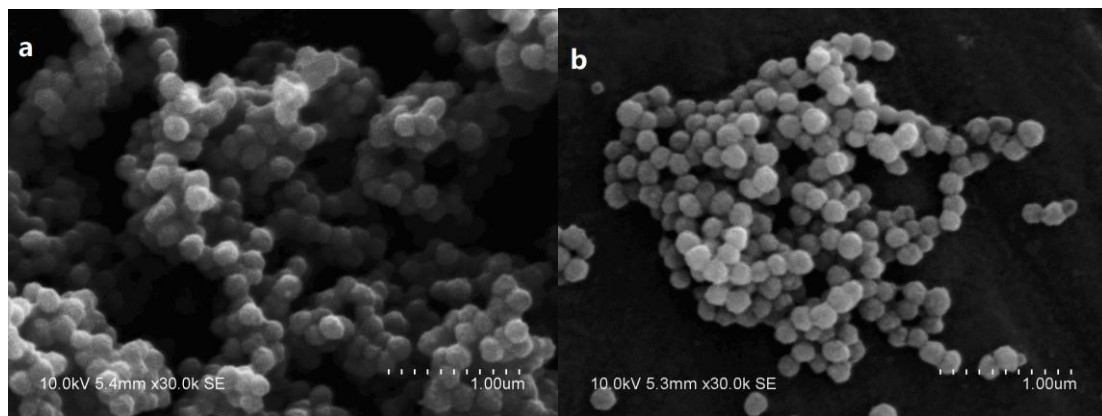

Figure S3 Comparison of on-line cyclic incubation at different flow rate (a), off-line pre-mixed incubation and on-line cyclic incubation at flow rate of  $2 \mu\text{L s}^{-1}$  (b).

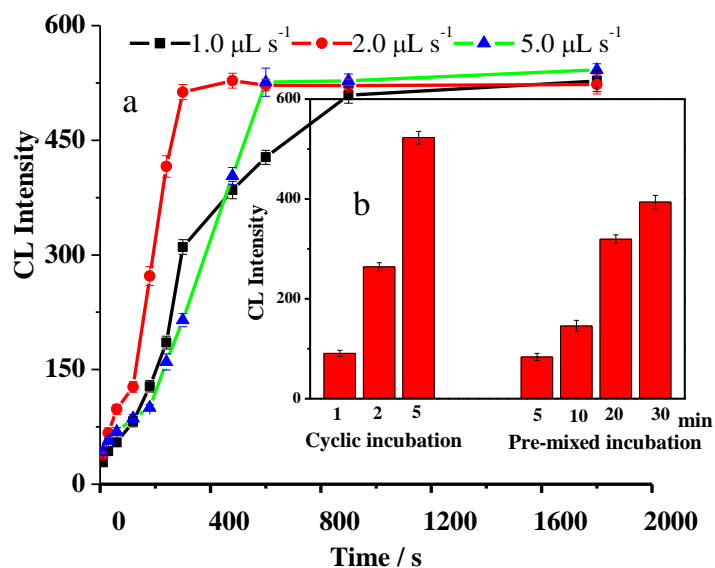

Figure S4 Repeated use of MB/PEI/Ab1 after regeneration by  $0.1 \text{ mol L}^{-1}$  Glycine/HCl (pH 3.0)

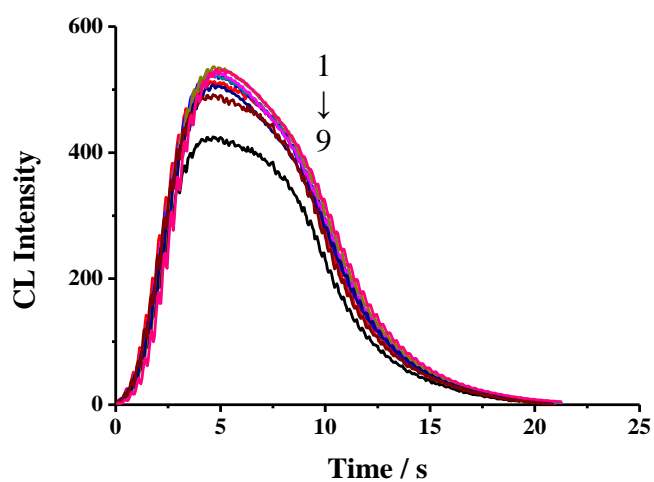

Supplement: c2an36513h.pdf [file c2an36513h.pdf]
